# Supplementary material for: Achieving multicolour and multimodal luminescence in Ca3Al2Ge3O12:Bi3+/Ln3+(Ln = Tb, Eu, Sm, and Dy) persistent phosphors for multiple applications
Source: Royal Society of Chemistry journal article supplement (doi:10.1039/d3tc00921a), 2023-01-01
Supplement: d3tc00921a1.pdf [file d3tc00921a1.pdf]

### Support information

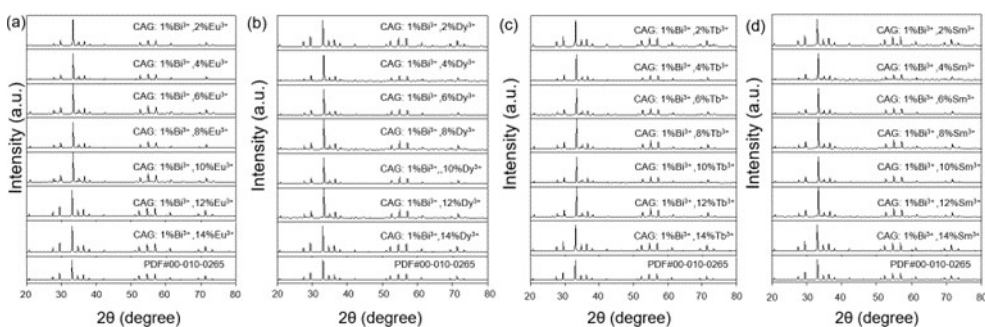

Fig.S1 (a-d) XRD pattern of CAG: 1.0%Bi<sup>3+</sup>/x%Ln<sup>3+</sup> (Ln = Eu, Tb, Dy, Sm) phosphor and standard card (PDF#00-010-0265).

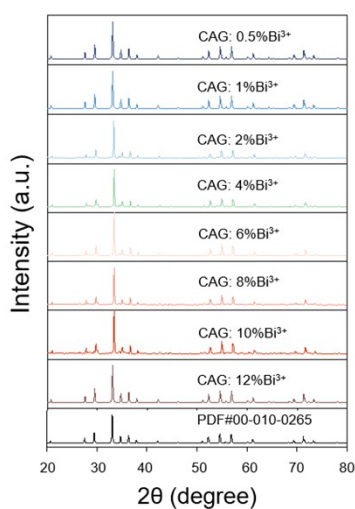

Fig.S2 (a-d) XRD pattern of CAG: 1.0%Bi<sup>3+</sup> phosphor and standard card (PDF#00-010-0265).

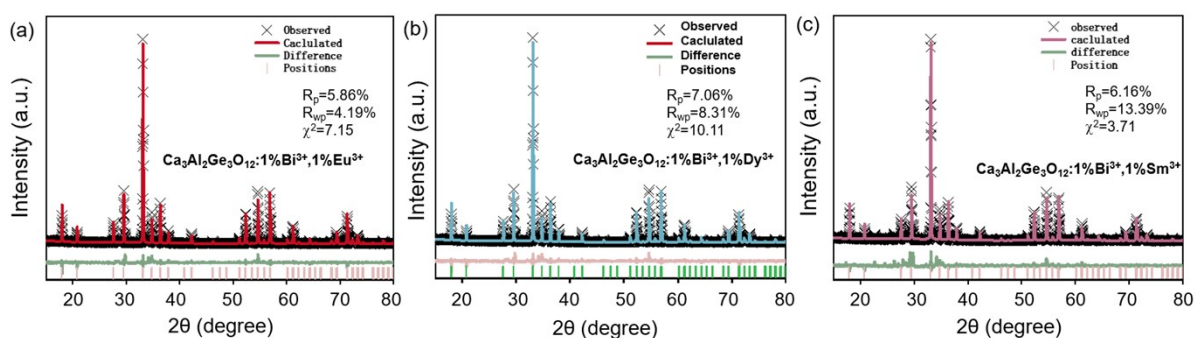

Fig.S3 The refinement XRD patterns of CAG:1%Dy<sup>3+</sup>, 1%Eu<sup>3+</sup>/Dy<sup>3+</sup>/Sm<sup>3+</sup>(a-c).

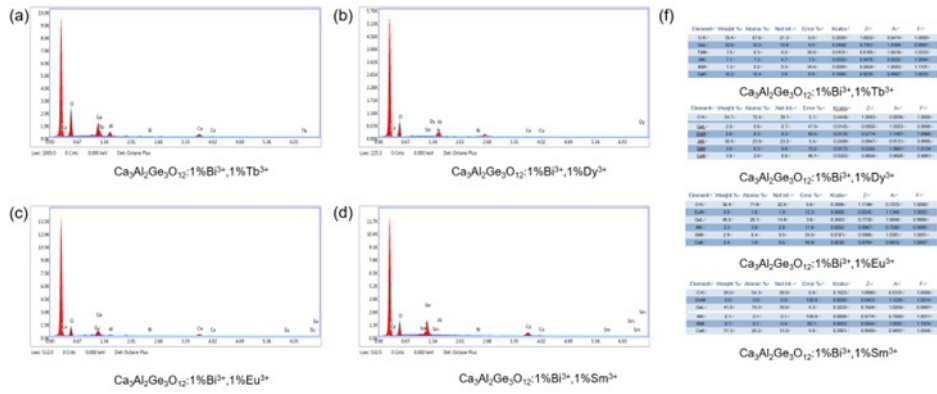

Fig.S4 (a-d) EDS spectrum of CAG: 1.0%Bi<sup>3+</sup>/1%Ln<sup>3+</sup> (Ln = Eu, Tb, Dy, Sm), (f) the weight and atomic percentage.

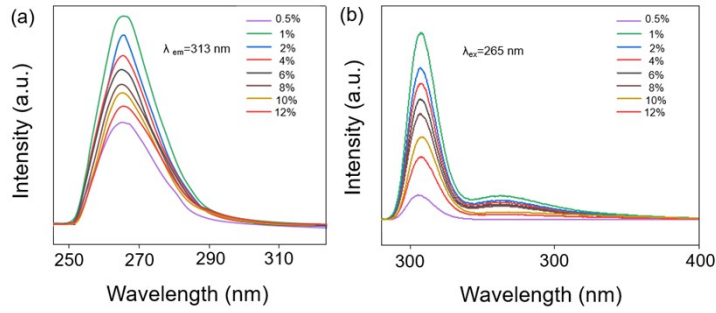

Fig.S5 (a) PLE and (b) PL spectra of CAG:  $x\text{Bi}^{3+}$  ( $x=0.5\%-12\%$ ,  $\lambda_{\text{em}} = 313\text{ nm}$ ,  $\lambda_{\text{ex}} = 265\text{ nm}$ ).

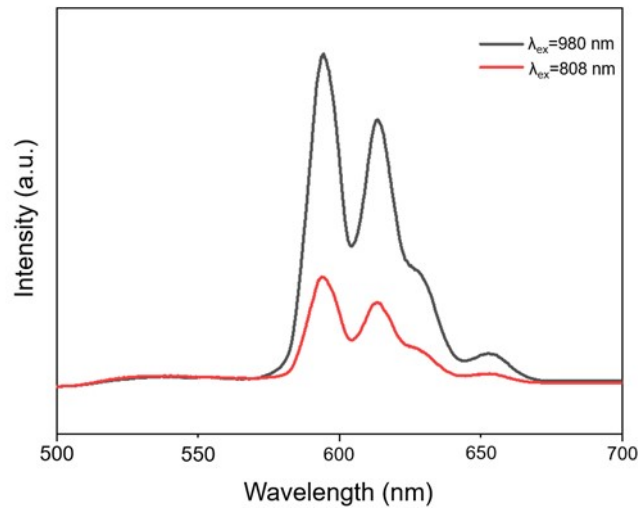

Fig.S6 PSL spectra upon 808 nm and 980 nm laser irradiation (0.7 W).

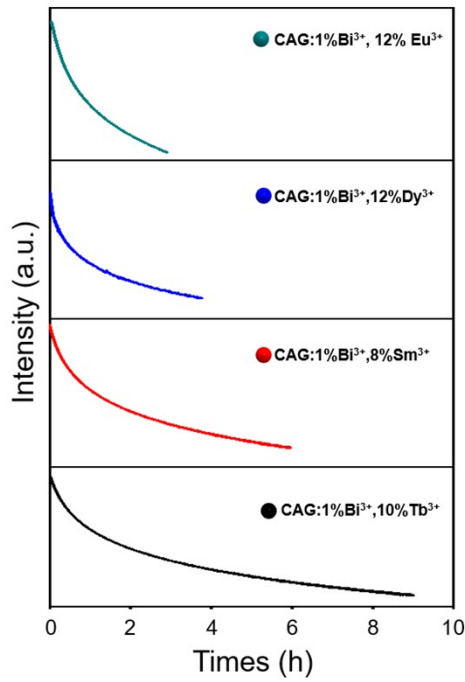

Fig.S7 CAG:1%B $^{3+}$ /xLn $^{3+}$ (x=12%Eu $^{3+}$ , 12%Dy $^{3+}$ , 8%Sm $^{3+}$ , 10%Tb $^{3+}$ ) afterglow duration under UV lamp irradiation.

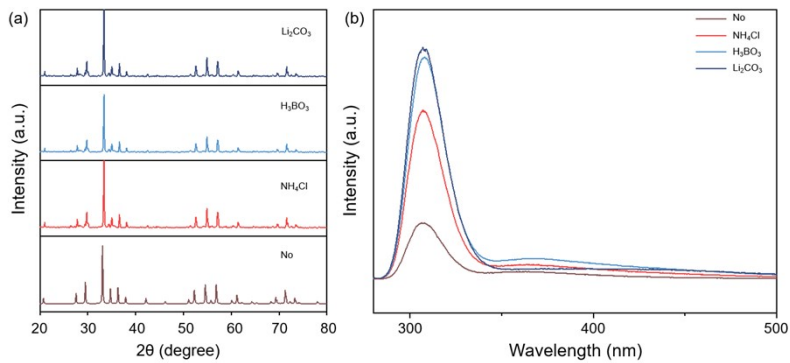

Fig. S8. (a) XRD patterns and (b) PersL spectra of CAG:1%B $^{3+}$  after adding different kinds of fluxes.

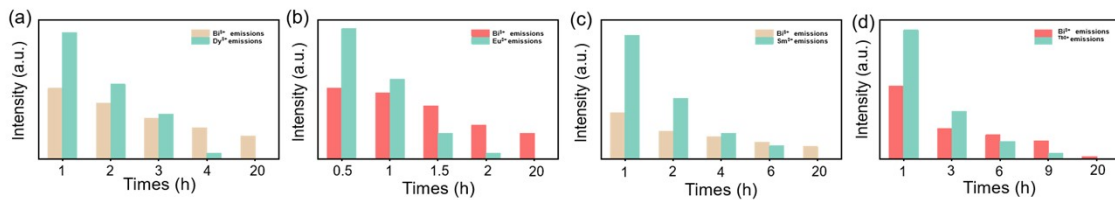

Fig.S9 (a) CAG: 1.0% Bi $^{3+}$ /x% Ln $^{3+}$  (Ln=Eu, Tb, Dy, Sm) afterglow emission intensity comparison at different times.

Table S1 Commission International de l'Eclairage (CIE) for CAG: 1.0% Bi<sup>3+</sup>/x% Ln<sup>3+</sup> (Ln =Eu, Tb, Dy, Sm) chromaticity coordinates column at different concentrations.

| Temperature | 1.0%Bi <sup>3+</sup> / | 1.0%Bi <sup>3+</sup> / | 1.0%Bi <sup>3+</sup> / | 1.0%Bi <sup>3+</sup> / |
|-------------|------------------------|------------------------|------------------------|------------------------|
|             | 0.5%Tb <sup>3+</sup>   | 0.5%Eu <sup>3+</sup>   | 0.5%Dy <sup>3+</sup>   | 0.5%Sm <sup>3+</sup>   |
| 1%          | (0.1675,0.1817)        | (0.2127,0.0927)        | (0.1729,0.1339)        | (0.2163,0.2674)        |
| 2%          | (0.1876,0.2133)        | (0.2442,0.1053)        | (0.2011,0.1511)        | (0.2451,0.2775)        |
| 4%          | (0.2054,0.2437)        | (0.2828,0.1075)        | (0.2134,0.1644)        | (0.2611,0.2889)        |
| 6%          | (0.2471,0.3784)        | (0.3473,0.1231)        | (0.2348,0.1958)        | (0.3024,0.3017)        |
| 8%          | (0.2502,0.4011)        | (0.3875,0.1311)        | (0.2481,0.2238)        | (0.3612,0.3147)        |
| 10%         | (0.2534,0.4326)        | (0.4122,0.1384)        | (0.2597,0.2318)        | (0.3789,0.3262)        |
| 12%         | (0.2746,0.4744)        | (0.4785,0.1482)        | (0.2878,0.2575)        | (0.4149,0.3365)        |
| 14%         | (0.2783,0.4934)        | (0.5668,0.1778)        | (0.2978,0.2862)        | (0.4270,0.3456)        |
